# Supplementary material
Source: PubMed Central journal article supplement (PMC4011991)

# SUPPLEMENTARY FIGURE 1

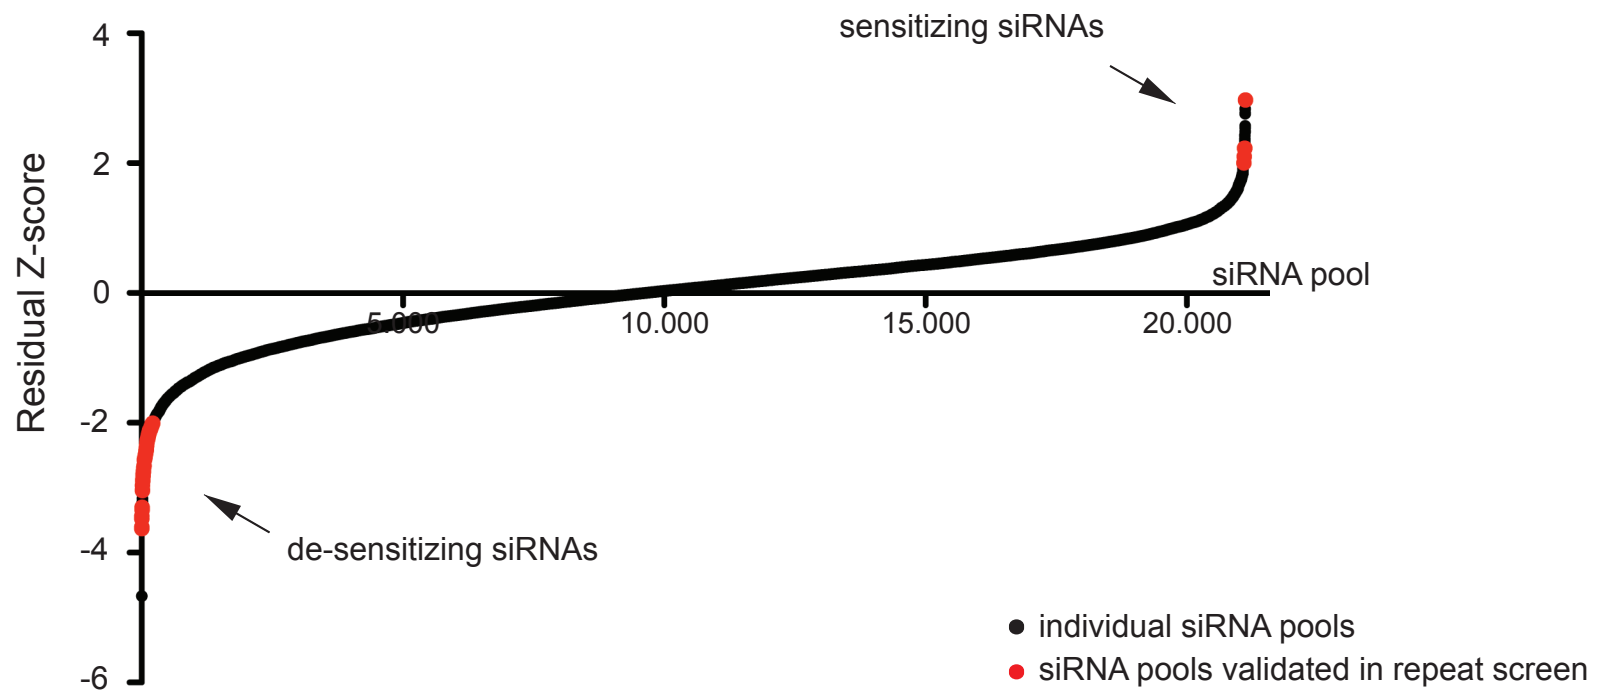

SUPPLEMENTARY FIGURE 2

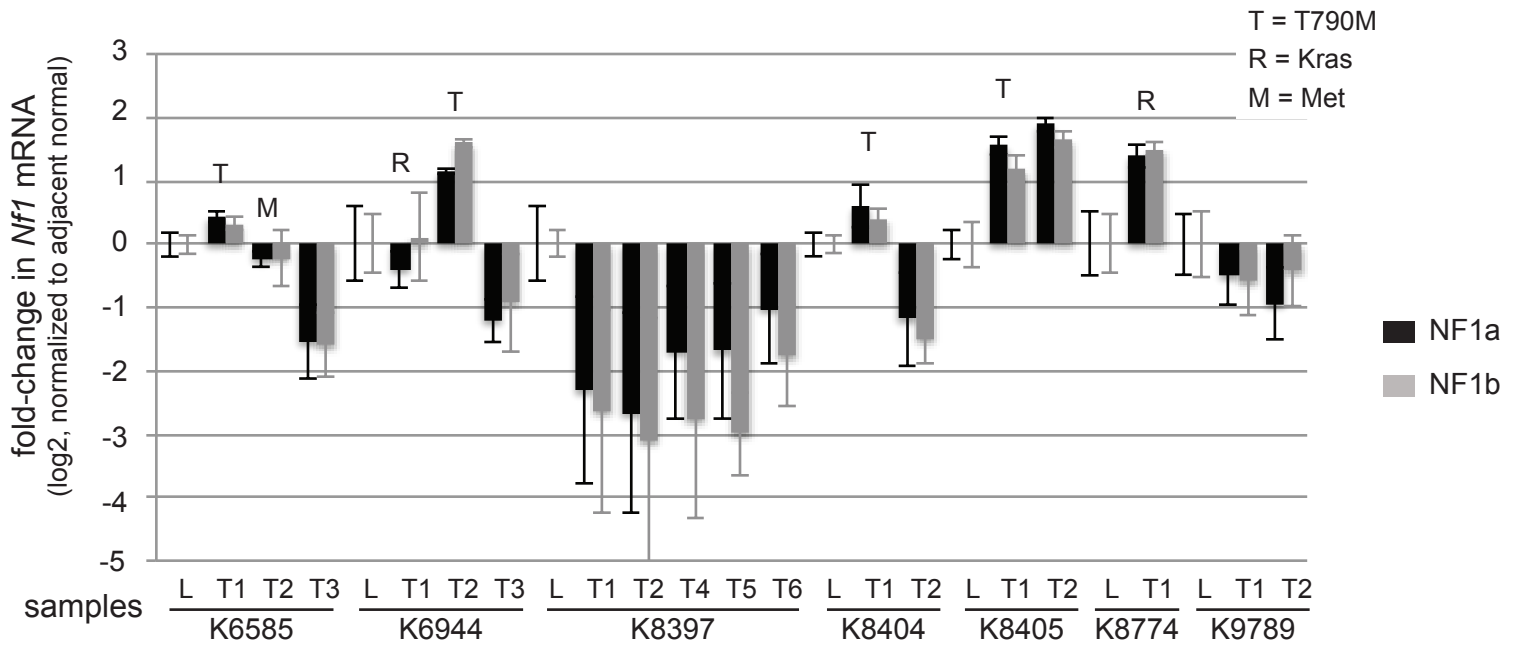

# SUPPLEMENTARY FIGURE 3

**A**

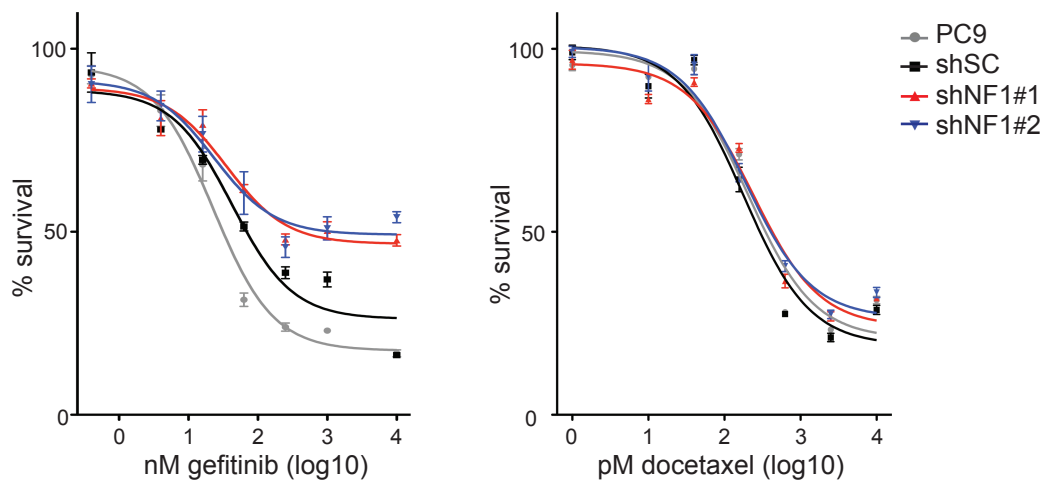

**B**

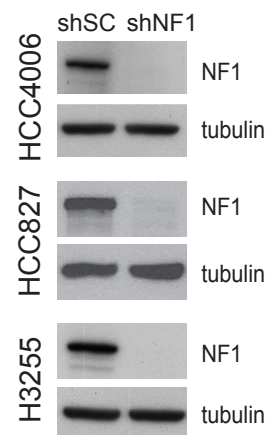

**C**

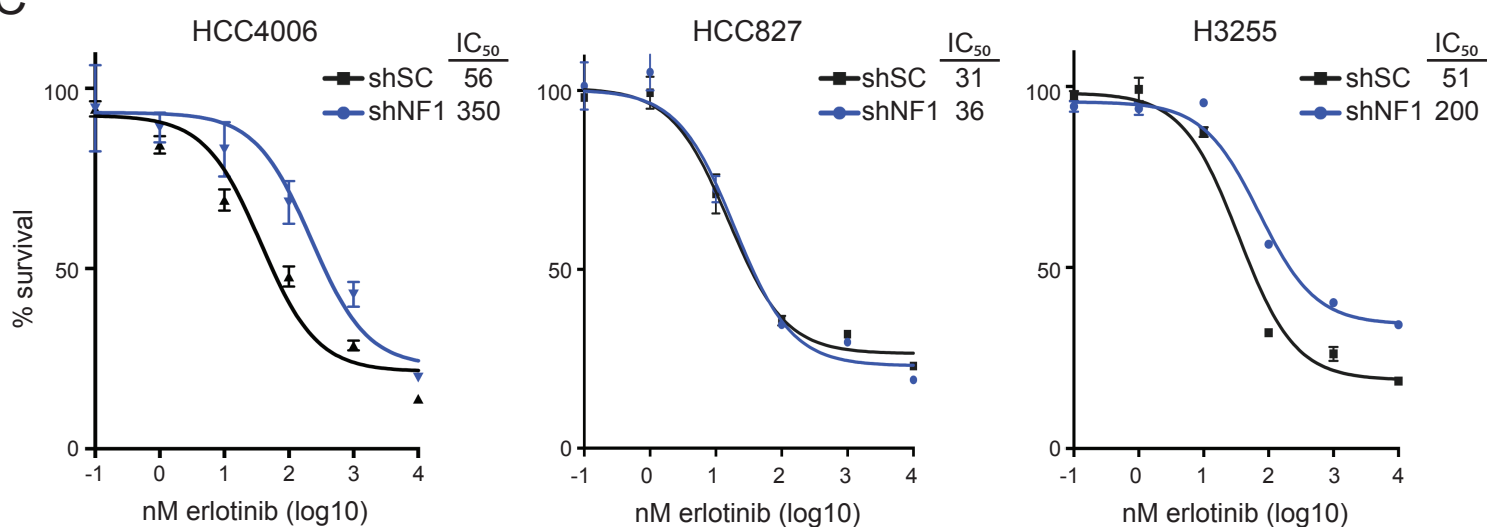

**D**

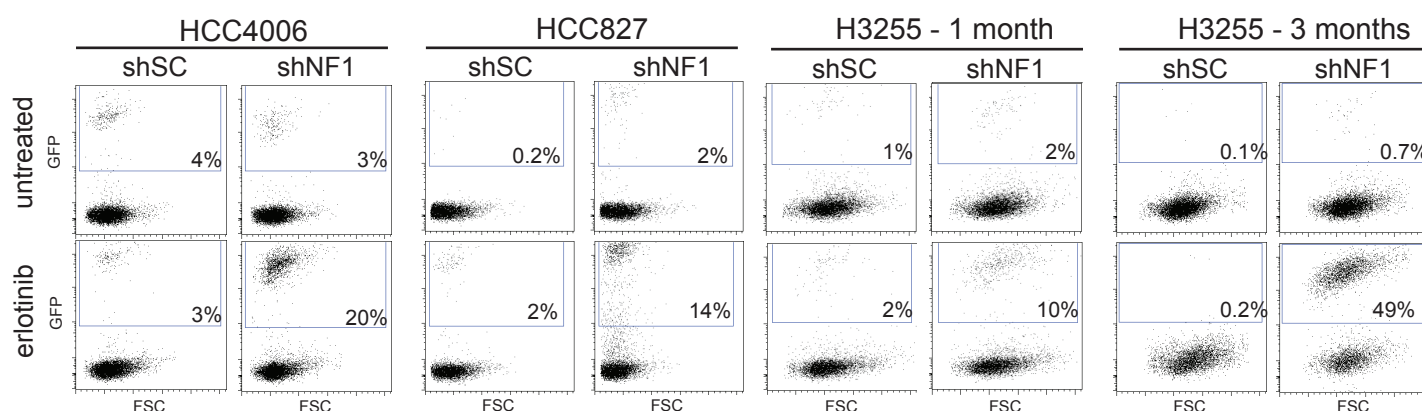

**E**

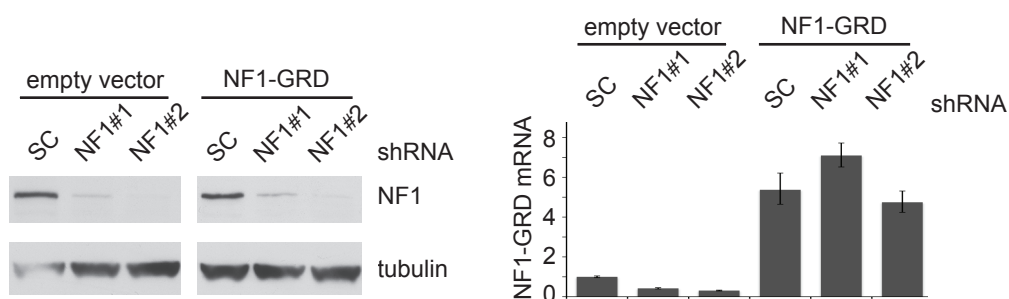

SUPPLEMENTARY FIGURE 4

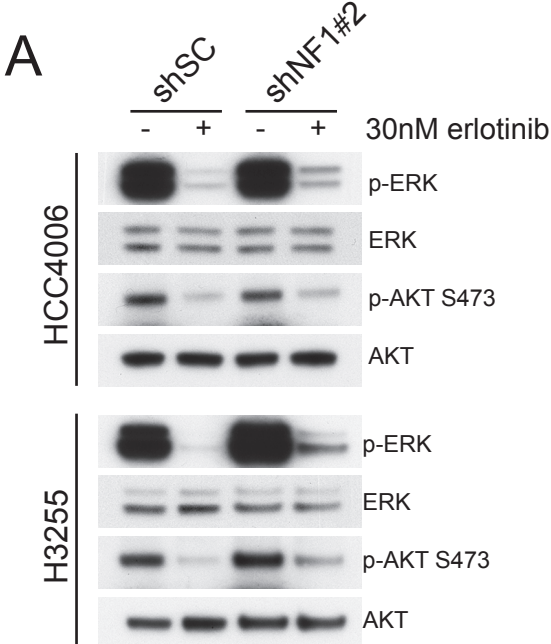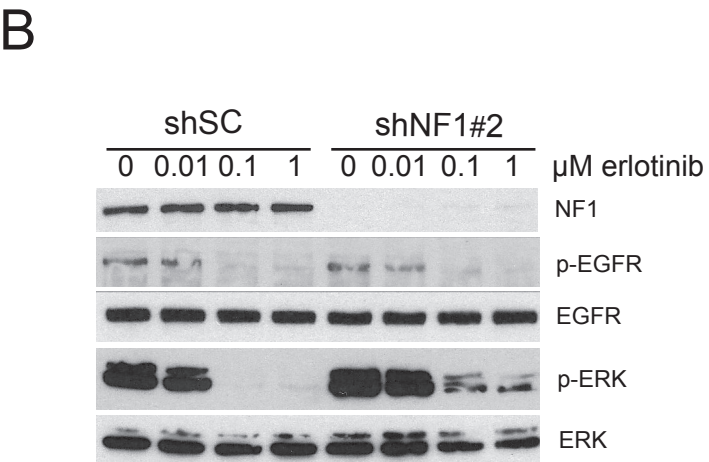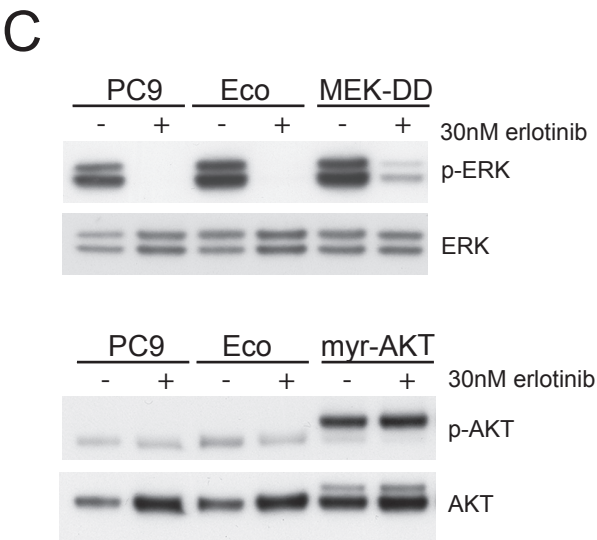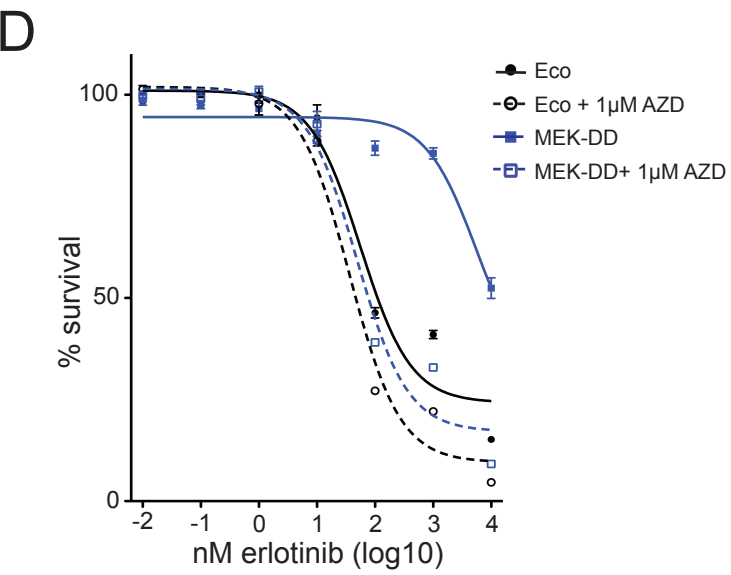



# SUPPLEMENTARY FIGURE 5

## A

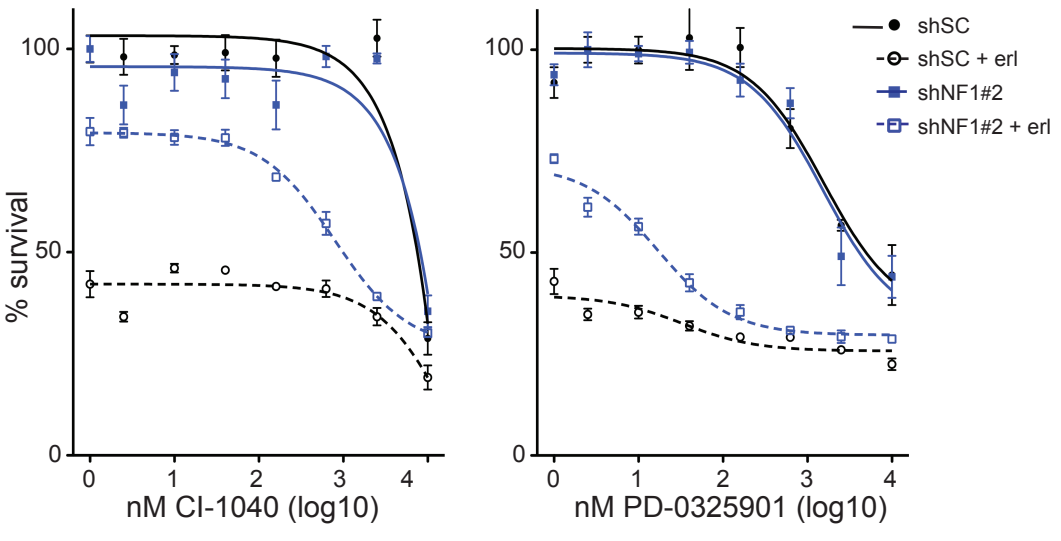

## B

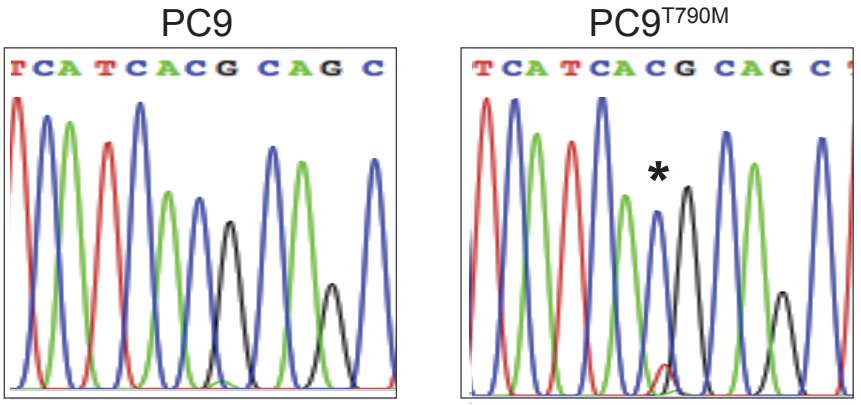

# SUPPLEMENTARY FIGURE 6

Week on protocol  
tumor volume

8 - OFF  
n.d.

12 - ON erl  
12.4 mm<sup>3</sup>

16 - ON erl  
15.5 mm<sup>3</sup>

20 - ON erl + MEKi  
4.1 mm<sup>3</sup>

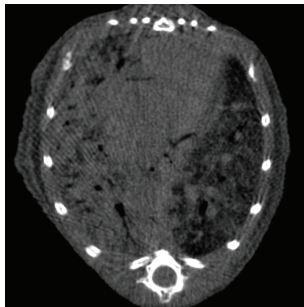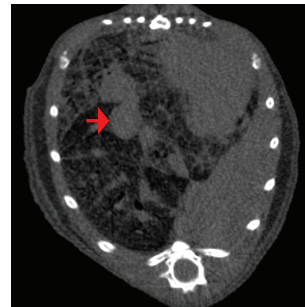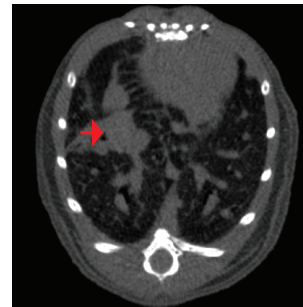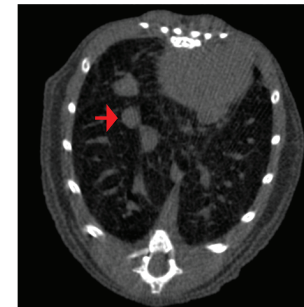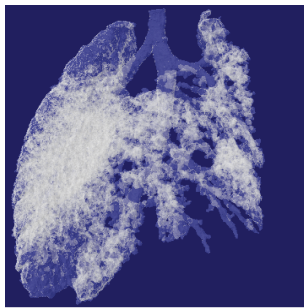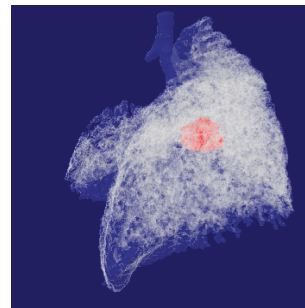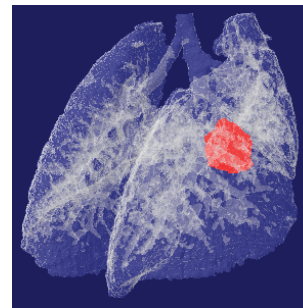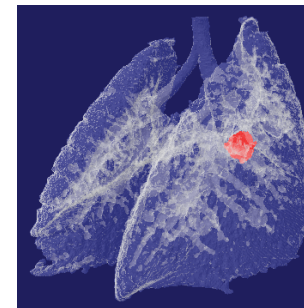

# SUPPLEMENTARY FIGURE 7

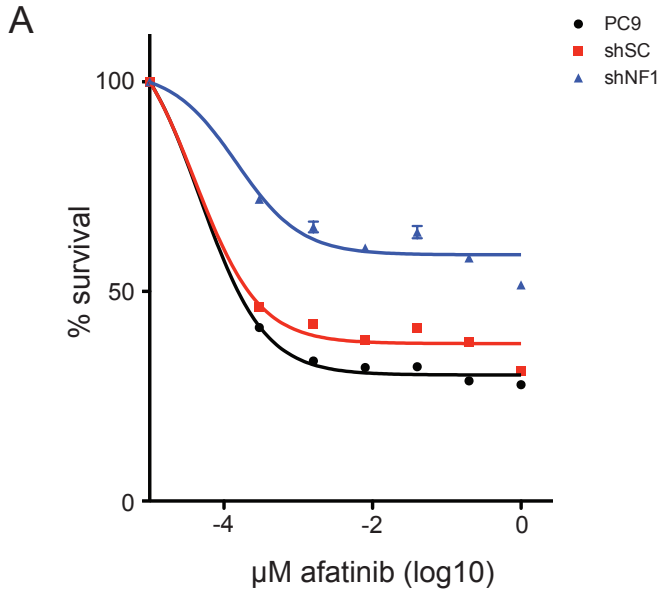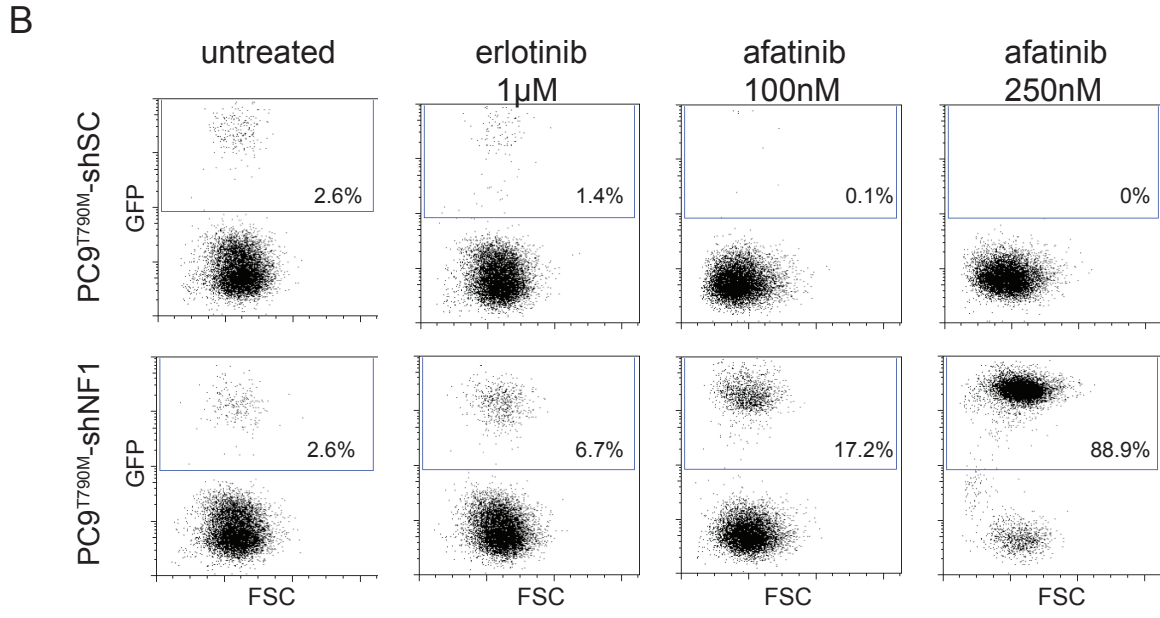

Supplement: NIHMS568239-supplement-2.pdf [file NIHMS568239-supplement-2.pdf]
